# Supplementary material for: An optimized disease resistance gene cloning workflow for wheat
Source: Research Square preprint supplement (doi:10.21203/rs.3.rs-4674614/v1), 2024-07-16
Supplement: Supplementary file 1 [file dc3b195b6585b62e22607494.xlsx]

## Sheet: Supplementary table 1
Supplementary Table 1. All mutations in TA5602 and TA5605 induced by EMS mutagenesis.
Mutant	Mutation type	Nucleotide mutation	Amino acid change	Domain
TA5605spgt16	Premature stop codon mutation	G36A	W12*	-
TA5602spgt36	Premature stop codon mutation	G86A	W29*	-
TA5605spgt114	Amino acid substitution	G190A	A64T	Rx-CC_like
TA5605spgt34	Amino acid substitution	G244A	D82N	Rx-CC_like
TA5602spgt34	Premature stop codon mutation	C421T	Q141*	-
TA5605spgt91	Premature stop codon mutation	G534A	W178*	-
TA5605spgt41	Amino acid substitution	G559A	G187S	ZF_BED
	Amino acid substitution	G1856A	G619E	NB-ARC
	Amino acid substitution	G3805A	E1269K	LRR
TA5605spgt75	Amino acid substitution	C572T	T191I	ZF_BED
TA5605spgt79	Amino acid substitution	G620A	G207D	ZF_BED
	Amino acid substitution	G4307A	G1436E	LRR
TA5605spgt60	Premature stop codon mutation	G830A	W277*	-
TA5605spgt49	Premature stop codon mutation	C880T	Q294*	-
TA5605spgt9	Premature stop codon mutation	C1000T	Q334*	-
TA5605spgt73	Amino acid substitution	G1075A	V359I	NB-ARC
	Amino acid substitution	G2564A	R855Q	LRR
TA5602spgt17	Amino acid substitution	G1112A	G371E	NB-ARC
TA5602spgt29	Premature stop codon mutation	G1188A	W396*	-
TA5605spgt112	Premature stop codon mutation	G1188A	W396*	-
TA5602spgt19	Amino acid substitution	G1225A	E409K	NB-ARC
TA5602spgt5	Amino acid substitution	G1234A	D412N	NB-ARC
TA5602spgt15	Amino acid substitution	C1243T	P415S	NB-ARC
TA5602spgt23	Amino acid substitution	C1244T	P415L	NB-ARC
TA5605spgt97	Amino acid substitution	G1249A	E417K	NB-ARC
TA5602spgt45	Amino acid substitution	G1262A	G421E	NB-ARC
TA5602spgt2	Amino acid substitution	G1336A	D446N	NB-ARC
TA5602spgt43	Amino acid substitution	G1336A	D446N	NB-ARC
TA5605spgt24	Amino acid substitution	C1387T	P463S	NB-ARC
TA5605spgt26	Amino acid substitution	C1388T	P463L	NB-ARC
TA5602spgt20	Amino acid substitution	T1427A	V476E	NB-ARC
TA5605spgt17	Amino acid substitution	G1436A	R479K	NB-ARC
TA5605spgt90	Amino acid substitution	G1462A	G488R	NB-ARC
TA5602spgt24	Amino acid substitution	G1463A	G488E	NB-ARC
TA5602spgt42	Amino acid substitution	C1466T	T489M	NB-ARC
TA5605spgt95	Premature stop codon mutation	G1596A	W532*	-
TA5605spgt77	Amino acid substitution	G1607A	G536D	NB-ARC
TA5602spgt49	Amino acid substitution	G1618A	A540T	NB-ARC
TA5605spgt11	Amino acid substitution	G1633A	G545R	NB-ARC
TA5602spgt35	Amino acid substitution	G1634A	G545E	NB-ARC
TA5605spgt2	Amino acid substitution	C1759T	P587S	NB-ARC
TA5605spgt3	Amino acid substitution	C1801T	P601S	NB-ARC
TA5602spgt27	Amino acid substitution	C1837T	R613C	NB-ARC
TA5602spgt47	Premature stop codon mutation	G1845A	W615*	-
TA5602spgt37	Premature stop codon mutation	A1882T	K628*	NB-ARC
TA5602spgt3	Amino acid substitution	G1900A	G634R	NB-ARC
TA5605spgt12	Amino acid substitution	G1900A	G634R	NB-ARC
TA5605spgt28	Amino acid substitution	G1901A	G634E	NB-ARC
TA5605spgt109	Amino acid substitution	G1924A	V642M	NB-ARC
TA5605spgt74	Amino acid substitution	G2087A	C696Y	NB-ARC
	Amino acid substitution	G3745A	A1249T	LRR
TA5605spgt31	Amino acid substitution	C2177T	T726M	LRR
TA5602spgt16	Amino acid substitution	G2255A	R752H	LRR
	Amino acid substitution	G3542A	G1181E	LRR
TA5605spgt15	Amino acid substitution	C2317T	P773S	LRR
TA5602spgt44	Amino acid substitution	C2318T	P773L	LRR
TA5605spgt101	Amino acid substitution	C2318T	P773L	LRR
TA5602spgt31	Amino acid substitution	G2347A	V783I	LRR
TA5605spgt22	Amino acid substitution	C2470T	R824W	LRR
TA5605spgt27	Amino acid substitution	C2575T	L859F	LRR
TA5605spgt25	Premature stop codon mutation	C2578T	Q860*	-
TA5605spgt32	Amino acid substitution	C2612T	S871F	LRR
TA5605spgt111	Amino acid substitution	C2612T	S871F	LRR
TA5602spgt1	Amino acid substitution	C2954T	T985I	LRR
	Amino acid substitution	C2986T	L996F	LRR
TA5605spgt19	Amino acid substitution	C2977T	P993S	LRR
TA5605spgt59	Amino acid substitution	C2978T	P993L	LRR
TA5602spgt8	Amino acid substitution	C2990T	A997V	LRR
TA5602spgt26	Premature stop codon mutation	G3048A	W1016*	-
TA5605spgt113	Premature stop codon mutation	G3048A	W1016*	-
TA5605spgt86	Amino acid substitution	C3058T	P1020S	LRR
TA5605Spgt42-2	Amino acid substitution	C3076T	P1026S	LRR
TA5605spgt82	Amino acid substitution	G3272A	G1091E	LRR
TA5605spgt72	Amino acid substitution	C3313T	P1105S	LRR
TA5605spgt10	Amino acid substitution	C3314T	P1105L	LRR
TA5605spgt1	Amino acid substitution	C3374T	P1125L	LRR
TA5605spgt84	Amino acid substitution	G3461A	G1154D	LRR
TA5605spgt51	Amino acid substitution	C3554T	A1185V	LRR
TA5605spgt81	Amino acid substitution	C3554T	A1185V	LRR
TA5602spgt10	Amino acid substitution	G3595A	G1199S	LRR
TA5605spgt23	Amino acid substitution	G3628A	G1210R	LRR
TA5605spgt108	Amino acid substitution	G3743A	G1248E	LRR
TA5602spgt30	Amino acid substitution	G3749A	C1250Y	LRR
TA5602spgt6	Amino acid substitution	G3752A	G1251E	LRR
TA5605spgt104	Premature stop codon mutation	G3762A	W1254*	-
TA5602spgt11	Premature stop codon mutation	G3768A	W1256*	-
TA5602spgt21	Premature stop codon mutation	G3768A	W1256*	-
TA5605spgt71	Amino acid substitution	G3824A	C1275Y	LRR
TA5602spgt18	Amino acid substitution	C3949T	R1317C	LRR
TA5605spgt18	Premature stop codon mutation	C3982T	Q1328*	-
TA5605spgt7	Amino acid substitution	A4007T	H1336L	LRR
TA5605spgt39	Amino acid substitution	A4007T	H1336L	LRR
TA5602spgt32	Amino acid substitution	G4010A	G1337D	LRR
TA5605spgt85	Amino acid substitution	G4010A	G1337D	LRR
TA5605spgt83	Amino acid substitution	G4079A	C1360Y	LRR
TA5605spgt110	Amino acid substitution	G4154A	G1385D	LRR
TA5602spgt4	Amino acid substitution	C4369T	L1457F	LRR
TA5602spgt33	Amino acid substitution	C4369T	L1457F	LRR
TA5605spgt76	Amino acid substitution	C4369T	L1457F	LRR
TA5605spgt5	Amino acid substitution	C4414T	P1472S	LRR
TA5605spgt35	Amino acid substitution	C4415T	P1472L	LRR
TA5605spgt106	Amino acid substitution	T4424A	L1475Q	LRR
TA5605spgt13	Premature stop codon mutation	C4444T	Q1482*	-
TA5602spgt28	Amino acid substitution	G4466A	C1489Y	LRR

## Sheet: Supplementary table 2
Supplementary Table 2. Primers used in this study.
Name	Sequence	Purpose
FL-F1	CCCATTTTGCTTATAACCAAGCAAACC	PCR amplification
FL-F2	TCTGCTACTCCACACCCCCT	PCR amplification and Sanger sequencing
F3	CTACATCGATGCACATCATCACCT	Sanger sequencing
F4	GCAGAGCAATCCAAGTAAGAGATTG	Sanger sequencing
F5	TGGCAGCAATGAATCCGACTCA	Sanger sequencing
FL-R1	ACTACAGTATAGTAAACTTTGGGCATGG	PCR amplification
FL-R2	TGCAACTATGTCTGCTGTGCAG	PCR amplification and Sanger sequencing
R3	ACTCTGCTCACGGAAATACTACAG	Sanger sequencing
R4	CATAAGACCACACACAACATATGAATCTT	Sanger sequencing
Sr6-VIGS1-Xba1-F	GTACTCTAGACACTCTAAAGAACTGTCGTCTGTTG	Virus-induced gene silencing of Sr6
Sr6-VIGS1-Apa1-R	GTACGGGCCCGAATGCCAAAATATTTCCATCTAACACGA	Virus-induced gene silencing of Sr6
Sr6-VIGS2-Xba1-F	GTACTCTAGAAGCCCGAAGGCATGCATGAAG	Virus-induced gene silencing of Sr6
Sr6-VIGS2-Apa1-R	GTACGGGCCCCACTCGGCGCTATTGACATGAG	Virus-induced gene silencing of Sr6
Xcfd43-F	AACAAAAGTCGGTGCAGTCC	SSR marker
Xcfd43-R	CCAAAAACATGGTTAAAGGGG	SSR marker
Sr6-KASP-F	GCAGAGTCTCAAAATTTCCAACAATAGAAG	Sr6 KASP marker
Sr6-KASP-R1	GAAGGTGACCAAGTTCATGCTAACGGCTCCTCACCTATGGTTAAAAT	Sr6 KASP marker
Sr6-KASP-R2	GAAGGTCGGAGTCAACGGATTAACGGCTCCTCACCTATGGTTAAACG	Sr6 KASP marker
